# Supplementary material for: Endurance Exercise Ability in the Horse: A Trait with Complex Polygenic Determinism
Source: PubMed Central journal article supplement (PMC5488500; doi:10.3389/fgene.2017.00089), 2017-06-28
Supplement: Table2.pdf [file Table2.pdf]

## SUPPLEMENTARY MATERIAL:

### Title: Endurance exercise ability in the horse: a trait with complex polygenic determinism

Anne Ricard<sup>1,2§</sup>, Céline Robert<sup>1,3</sup>, Christine Blouin, Fanny Baste<sup>1</sup>, Gwendoline Torquet<sup>1</sup>, Caroline Morgenthaler<sup>1</sup>, Julie Rivière<sup>1</sup>, Nuria Mach<sup>1</sup>, Xavier Mata<sup>1</sup>, Laurent Schibler<sup>1</sup>, Eric Barrey<sup>1§</sup>  
§ corresponding authors

**Figure S1: Details on the twelve haplotypes associated to the averaged speed.** Frequency of twelve significant haplotypes centred on SNP BIEC\_11782. The haplotypes are ordered by decreasing frequency. Among the 4 most frequent haplotypes, 2 are negatively associated with the speed and 2 are positively associated with the speed but less frequent. The last 6 haplotypes are significant but their effect was poorly estimated. Each haplotype was defined by a set of 7 SNPs centred on SNP BIEC\_11782 (Chr1: 25715334). File Image 1.PDF

**Figure S2: Genetic map of *SORCS3* gene on equine chromosome 1.** One intronic SNP BIEC2\_11782 was detected in intron #16. This SNP was significantly associated with the average race speed in endurance ride. File Image 2.PDF

**Figure S3: Genetic map of *SLC39A12* gene on equine chromosome 29.** Two close SNPs BIEC2\_75563 and BIEC2\_755604 were detected in intron #51. These SNPs were significantly associated with the finishing status in endurance ride. File Image 3.PDF

**Table S1:** Phenotypes and pseudo-performance values of the 597 horses genotyped. This table presents the three traits as pseudo-performance and the equivalent number of races performed by the horse (ENP). The pseudo-performance value was weighted by the number of observations per horse and by genetic parameters. The weighting factor was referred to as the equivalent number of performances (ENP). All the horses are Purebred Arabian or crossed Arabian with at least 50% Arabian blood (see the breed codes used by the French studbook (SIRE) in the panel 2). Performances were measured in French endurance races from 2002 to 2011 (38473 results, 7363 horses) with 3 traits: speed (S; standardized by race), total run distance (D), Finishing status (F, discrete measure: qualified/retired/eliminated). According to Ricard et Touvais (2007) and after updating with more recent genetic parameters, the following multitrait model was used:

$$\mathbf{y} = \mathbf{Xb} + \mathbf{Zu} + \mathbf{Zp} + \mathbf{e}$$

With  $\mathbf{y}$  the vector of performances for the 3 criteria,  $\mathbf{b}$  vector of fixed effect, which included sex (female, male, castrated), age (from 6 years to 12 years by 1 and 13 years and more), race (2263 races, no race effect for the trait D),  $\mathbf{p}$  the vector of permanent environmental random effect common to the different performances of the same horse (7363 effects for each trait), and  $\mathbf{a}$  the random polygenic effect (35068 horses including ancestors for each trait).  $\mathbf{X}$  and  $\mathbf{Z}$  are incidence matrices. The variance-covariance matrices of random effects were:

$$V(\mathbf{a}) = \mathbf{A} \otimes \mathbf{G} \text{ with } \otimes \text{ the direct product, } \mathbf{A} \text{ the relationship matrix and } \mathbf{G} = \begin{bmatrix} \sigma_{a,1}^2 & \sigma_{a,12} & \sigma_{a,13} \\ \sigma_{a,12} & \sigma_{a,2}^2 & \sigma_{a,23} \\ \sigma_{a,13} & \sigma_{a,23} & \sigma_{a,3}^2 \end{bmatrix} \text{ the}$$

genetic variance and covariance between the 3 traits (1=S, 2=D and 3=F),  $V(\mathbf{p}) = \mathbf{I} \otimes \mathbf{P}$  and

$$\mathbf{P} = \begin{bmatrix} \sigma_{p,1}^2 & \sigma_{p,12} & \sigma_{p,13} \\ \sigma_{p,12} & \sigma_{p,2}^2 & \sigma_{p,23} \\ \sigma_{p,13} & \sigma_{p,23} & \sigma_{p,3}^2 \end{bmatrix} \text{ the permanent environmental variance and covariance between the 3 criteria}$$

$$\text{and } V(\mathbf{e}) = \mathbf{I} \otimes \mathbf{P} \text{ and } \mathbf{R} = \begin{bmatrix} \sigma_{e,1}^2 & 0 & 0 \\ 0 & \sigma_{e,2}^2 & 0 \\ 0 & 0 & \sigma_{e,3}^2 \end{bmatrix}. \text{ We used Gibbs sampling (Software TM, [2]) to estimate}$$

the genetic parameters defined as: the heritability  $h_i^2 = \frac{\sigma_{a,ii}^2}{\sigma_{a,ii}^2 + \sigma_{p,ii}^2 + \sigma_{e,ii}^2}$  and the repeatability

$$r_i = \frac{\sigma_{a,ii}^2 + \sigma_{p,ii}^2}{\sigma_{a,ii}^2 + \sigma_{p,ii}^2 + \sigma_{e,ii}^2} \text{ for } i=1,2,3, \text{ the genetic correlation } r_{a,ij} = \frac{\sigma_{a,ij}}{\sigma_{a,ii} \sigma_{a,jj}}, \text{ the correlation between horse}$$

$$\text{abilities } (a_{i,k} + p_{i,k} \text{ for the horse } k \text{ and trait } i) r_{h,ij} = \frac{\sigma_{a,ij} + \sigma_{p,ij}}{\sqrt{(\sigma_{a,ii}^2 + \sigma_{p,ii}^2)(\sigma_{a,jj}^2 + \sigma_{p,jj}^2)}} \text{ for } i=1,2,3 \text{ and } j=1,2,3.$$

They are summarized in Table 1. For GWAS analysis, de-regressed estimates of horse ability ( $a_{i,k} + p_{i,k}$  for the horse  $k$  and trait  $i$ ) of genotyped horses were used. The pseudo-performance was then:

$y_{i,k}^* = \frac{\hat{a}_{i,k} + \hat{p}_{i,k}}{\rho_{i,k}}$  for trait  $i$  and horse  $k$  with  $\rho_{i,k}$  the reliability of the sum of estimates  $\hat{a}_{i,k} + \hat{p}_{i,k}$  obtained with the previous model. In that case, the residual variance associated to this pseudo-performance in a mixed model with polygenic effect is  $V(e_{i,k}) = \frac{1}{m_{i,k}} \sigma_{e_i}^2$  with  $m_{i,k} = \frac{\rho_{i,k}(1-r_i)}{(r_i - \rho_{i,k}h_i^2)}$ . The pseudo-performance  $y_{i,k}^*$  may be considered as a corrected mean of performances for fixed effects and the variable  $m_{i,k}$  as an equivalent number of performances (ENP) used to calculate this mean. Estimated horse abilities (EHA) of the sample compared to whole population are given Table S2, as well as pseudo-performances and their equivalent number of performances for the sample in Table S3. Horses used in GWAS are a selected sample as mean of EHA are higher than overall mean (about half standard deviation) but moderately and with a maintained diversity (same variance of EHA).  
File Table 1.XLSX

**Table S2:** Elementary statistics of estimated horse ability (EHA, breeding value plus environmental effect) in endurance races for all horses (n=7363) and for sample used in GWAS (n=597) in unit of phenotypic standard deviation.

| Traits                       | Mean |            | SD   |            | Min.  |            | Max. |            |
|------------------------------|------|------------|------|------------|-------|------------|------|------------|
|                              | All  | Genoty ped | All  | Genoty ped | All   | Genoty ped | All  | Genoty ped |
| EHA Speed                    | 0.18 | 0.36       | 0.48 | 0.52       | -1.23 | -1.12      | 1.73 | 1.69       |
| EHA Distance                 | 0.15 | 0.37       | 0.36 | 0.38       | -0.76 | -0.56      | 1.61 | 1.48       |
| EHA Finishing status         | 0.13 | 0.33       | 0.34 | 0.36       | -0.80 | -0.53      | 1.43 | 1.36       |
| Reliability Speed            | 0.57 | 0.69       | 0.22 | 0.15       | 0.00  | 0.09       | 0.93 | 0.92       |
| Reliability Distance         | 0.59 | 0.68       | 0.17 | 0.14       | 0.00  | 0.17       | 0.92 | 0.90       |
| Reliability Finishing status | 0.56 | 0.64       | 0.16 | 0.13       | 0.03  | 0.15       | 0.89 | 0.87       |

**Table S3:** De-regressed estimated ability (breeding value plus environmental effect), used as the pseudo-performance indicator in the GWAS (in phenotypic SD units) and the equivalent number of performances (ENP) (n=597).

| Traits               | Mean | SD   | Minimum | Maximum |
|----------------------|------|------|---------|---------|
| Speed                | 0.51 | 0.76 | -1.81   | 3.15    |
| Distance             | 0.54 | 0.55 | -1.01   | 2.12    |
| Finishing status     | 0.51 | 0.55 | -0.98   | 1.99    |
| ENP Speed            | 1.65 | 0.51 | 0.13    | 2.60    |
| ENP Distance         | 4.69 | 1.32 | 0.80    | 7.31    |
| ENP Finishing status | 4.72 | 1.37 | 0.72    | 7.61    |

**Table S4:** list of the three pairs of primers designed to detect the expression of the equine lncRNA candidate *KCNQ1OT1* orthologue. The endogenous gene used was 18S.

| Primer's ID            | Sequence (5' -3')      | Position within target sequence | Amplicon length |
|------------------------|------------------------|---------------------------------|-----------------|
| KCNQ1OT1-P1-FWD        | GCTTGCTTTGCTTTTAC TC   | 182-200                         | 194             |
| KCNQ1OT1-P1-REV        | GTTCTTTCTTGTTCTGT GTC  | 356-375                         |                 |
| KCNQ1OT1-P2-FWD        | GCCTTGTTTTTTTTCTCT GCT | 829-848                         | 222             |
| KCNQ1OT1-P2-REV        | TCGTTCTCTGCCTCTTC C    | 1033-1050                       |                 |
| KCNQ1OT1-P3-FWD        | TGGTCACCTCCCATAA CT    | 1967-1984                       | 234             |
| KCNQ1OT1-P3-REV        | TTGTCCCTCTACCCTTC T    | 2183-2200                       |                 |
| <b>Endogenous gene</b> |                        |                                 |                 |
| 18S-FWD                | AGGGTTCGTTCTGTGT TCC   | 975-994                         | 92              |
| 18S-REV                | GGCCACGCTTCCTTAC AGAT  | 1066-1047                       |                 |

**Table S5:** List of all the annotated genes located 4 Mbp upstream and 4 Mbp downstream of the SNPs associated with the performance traits. File Table 5.XLSX

**Table S6:** List of miRNAs located within 1Mpb of the SNP associated with performance traits.

| QTL# | SNP           | Distance / SNP | miRNA name            | 5' position | # Gene targets | # Pathways |
|------|---------------|----------------|-----------------------|-------------|----------------|------------|
| 6    | BIEC2_1022884 | 2 107 650      | eca-mir-763-5p        | 81 420 420  | 465            | NA         |
| 1    | BIEC2_11782   | 2 001 212      | eca-miR-146b-5p & -3p | 27716546    | 863            | 140        |
| 7    | BIEC2_977605  | 3 350 550      | eca-miR-7-2-5p        | 2 932 716   | 1218           | 156        |
| 16   | BIEC2_336016  | 1 312 983      | eca-mir-1289-3p       | 27 474 897  | 262            | 6          |

**Table S7:** Predicted pathways and number of genes targeted by the miRNAs 146b and 1289 (located close to the SNPs associated with performance traits).

| KEGG pathway                                         | p-value     | #genes | #miRNAs |
|------------------------------------------------------|-------------|--------|---------|
| Wnt signaling pathway                                | 8.79E-12    | 36     | 4       |
| Gap junction                                         | 3.48E-09    | 19     | 4       |
| Neurotrophin signaling pathway                       | 1.19E-08    | 27     | 4       |
| Pathways in cancer                                   | 1.19E-08    | 58     | 4       |
| Long-term potentiation                               | 6.42E-08    | 18     | 4       |
| ErbB signaling pathway                               | 8.45E-08    | 22     | 4       |
| Circadian rhythm                                     | 3.14E-07    | 10     | 3       |
| Ubiquitin mediated proteolysis                       | 3.58E-06    | 27     | 3       |
| Axon guidance                                        | 7.67E-06    | 26     | 4       |
| TGF-beta signaling pathway                           | 2.02E-05    | 18     | 4       |
| Glycosaminoglycan biosynthesis - chondroitin sulfate | 2.38E-05    | 3      | 2       |
| Focal adhesion                                       | 2.46E-05    | 34     | 4       |
| Dopaminergic synapse                                 | 2.97E-05    | 24     | 4       |
| Hedgehog signaling pathway                           | 3.21E-05    | 12     | 3       |
| GnRH signaling pathway                               | 4.90E-05    | 18     | 4       |
| Adherens junction                                    | 5.71E-05    | 17     | 3       |
| Biotin metabolism                                    | 0.000137576 | 1      | 1       |
| mTOR signaling pathway                               | 0.000144749 | 14     | 2       |
| Regulation of actin cytoskeleton                     | 0.000219436 | 34     | 4       |
| Amphetamine addiction                                | 0.000308041 | 15     | 4       |
| Protein processing in endoplasmic reticulum          | 0.000337889 | 28     | 4       |
| MAPK signaling pathway                               | 0.000544857 | 40     | 4       |
| Insulin signaling pathway                            | 0.000610997 | 23     | 4       |
| Fc gamma R-mediated phagocytosis                     | 0.001155323 | 17     | 4       |
| Melanogenesis                                        | 0.001155323 | 18     | 4       |
| VEGF signaling pathway                               | 0.001165635 | 13     | 4       |
| Notch signaling pathway                              | 0.001439462 | 10     | 2       |
| Lysine degradation                                   | 0.003811159 | 10     | 4       |
| PI3K-Akt signaling pathway                           | 0.01124231  | 43     | 4       |
| p53 signaling pathway                                | 0.01366734  | 12     | 4       |
| Long-term depression                                 | 0.0323868   | 13     | 4       |
| Serotonergic synapse                                 | 0.03896708  | 18     | 3       |
| Tight junction                                       | 0.03896708  | 20     | 4       |

**Table S8:** Results of the RTqPCR after reverse transcription of total RNA extracted from primary cultures of equine myoblasts and fibroblasts.

| Cell        | mean Ct | SD Ct | $2^{-\Delta\Delta Ct}$ |
|-------------|---------|-------|------------------------|
| Fibroblasts | 29.43   | 1.01  | 1.00                   |
| Myoblasts   | 30.23   | 3.99  | 0.57                   |

**Table S9: CpG islands found near to the significant SNPs.**

| QTL # | Distance from SNP | ID on the sequence | CpG start | CpG end |
|-------|-------------------|--------------------|-----------|---------|
| 6     | 20                | ID=EMBOSS_001.13   | 520379    | 520999  |
|       | 369               |                    |           |         |
|       | 21                | ID=EMBOSS_001.14   | 521261    | 521871  |
|       | 251               |                    |           |         |
|       | 32                | ID=EMBOSS_001.12   | 467232    | 467690  |
|       | 778               |                    |           |         |
| 1     | 33                | ID=EMBOSS_001.11   | 466752    | 467224  |
|       | 258               |                    |           |         |
|       | 33                | ID=EMBOSS_001.10   | 466130    | 466513  |
|       | 880               |                    |           |         |
|       | 34                | ID=EMBOSS_001.9    | 465653    | 466004  |
|       | 357               |                    |           |         |
| 1     | 38                | ID=EMBOSS_001.2    | 538566    | 538874  |
|       | 556               |                    |           |         |
|       | 39                | ID=EMBOSS_001.3    | 539395    | 539671  |
|       | 385               |                    |           |         |
|       | 39                | ID=EMBOSS_001.4    | 539683    | 540015  |
| 7     | 40                | ID=EMBOSS_001.5    | 540285    | 540734  |
|       | 673               |                    |           |         |
|       | 275               |                    |           |         |
| 7     | 40                | ID=EMBOSS_001.6    | 540780    | 541136  |
|       | 770               |                    |           |         |
|       | 10                | ID=EMBOSS_001.13   | 489325    | 489615  |
| 7     | 685               |                    |           |         |
|       | 11                | ID=EMBOSS_001.12   | 488936    | 489294  |
|       | 074               |                    |           |         |

**Table S10:** List of TF binding sites and candidate TFs located close to the QTL. File Table 10.XLSX

**Table S11:** Annotations of transcriptomic disorders and diseases with *KCNQ1OT1* deregulation in humans and in mouse models (extracted from the LncRNA database). File Table 11 XLSX
